# Supplementary material
Source: Elsevier journal article supplement (https://rcastoragev2.blob.core.windows.net/517626cdb65273f5fd6d8c6607e4f903/mmc1.pdf)
Supplement: mmc1 [file mmc1.pdf]

# THE LANCET Psychiatry

## **Supplementary appendix**

This appendix formed part of the original submission and has been peer reviewed.  
We post it as supplied by the authors.

Supplement to: Morrison AP, Pyle M, Gumley A, et al. Cognitive behavioural therapy in clozapine-resistant schizophrenia (FOCUS): an assessor-blinded, randomised controlled trial. *Lancet Psychiatry* 2018; published online July 9. [http://dx.doi.org/10.1016/S2215-0366\(18\)30184-6](http://dx.doi.org/10.1016/S2215-0366(18)30184-6).

## Reasons for ineligibility

|                                                                   | n           |
|-------------------------------------------------------------------|-------------|
| <b>After patients identified</b>                                  | <b>N=79</b> |
| No current positive symptoms of psychosis or problems             | 21 (26.6%)  |
| Dose of clozapine below 400mg and not limited due to side effects | 16 (20.3%)  |
| Lacking capacity to consent                                       | 9 (11.4%)   |
| Current CBT or CBT in past year                                   | 8 (10.1%)   |
| Never taken clozapine                                             | 7 (8.9%)    |
| Diagnosis not schizophrenia spectrum                              | 7 (8.9%)    |
| Discontinued clozapine > 2 years ago                              | 6 (7.6%)    |
| Moved out of area                                                 | 2 (2.5%)    |
| Diagnosis of a developmental disability                           | 1 (1.3%)    |
| Not English speaking                                              | 1 (1.3%)    |
| Deceased before consented                                         | 1 (1.3%)    |
| <b>After patients found to be eligible</b>                        | <b>N=47</b> |
| Below threshold on the Positive and Negative Syndrome Scale       | 40 (85.1%)  |
| Diagnosis not schizophrenia spectrum                              | 2 (4.3%)    |
| Lacking capacity to consent                                       | 2 (4.3%)    |
| Dose of clozapine below 400mg and not limited due to side effects | 1 (2.1%)    |
| No current positive symptoms of psychosis or problems             | 1 (2.1%)    |
| Unable to complete the baseline assessment                        | 1 (2.1%)    |

# Number of sessions attended for those randomised to CBT

|                                | CBT N=242        |
|--------------------------------|------------------|
| 0                              | 12 (5.0%)        |
| 1-5                            | 17 (7.0%)        |
| 6-10                           | 20 (8.3%)        |
| 11-20                          | 48 (19.8%)       |
| 21-30                          | 124 (51.2%)      |
| >31                            | 21 (8.7%)        |
| Median (25th, 75th centile); n | 23 (13, 28); 242 |

### PANSS outcome by symptom severity based on inclusion criteria

|                                | CBT N = 242      | TAU N = 245      |
|--------------------------------|------------------|------------------|
| PANSS total                    |                  |                  |
| Delusions < 4                  | 73.5 (11.7); 34  | 75.9 (13.2); 38  |
| Delusions ≥ 4                  | 84.3 (13.4); 208 | 84.7 (13.7); 207 |
| Hallucinatory behaviour < 4    | 80.6 (12.0); 53  | 81.0 (10.7); 42  |
| Hallucinatory behaviour ≥ 4    | 83.4 (14.1); 189 | 83.8 (14.6); 203 |
| Grandiosity < 5                | 81.4 (13.2); 207 | 82.1 (13.8); 208 |
| Grandiosity ≥ 5                | 90.7 (13.9); 35  | 90.4 (13.1); 37  |
| Suspiciousness persecution < 5 | 77.3 (11.8); 119 | 78.0 (13.5); 113 |
| Suspiciousness persecution ≥ 5 | 88.0 (13.3); 123 | 87.9 (12.8); 132 |
| PANSS positive                 |                  |                  |
| Delusions < 4                  | 17.6 (4.1); 34   | 18.4 (3.0); 38   |
| Delusions ≥ 4                  | 25.9 (5.3); 208  | 26.4 (5.2); 207  |
| Hallucinatory behaviour < 4    | 23.3 (4.4); 53   | 23.0 (3.7); 42   |
| Hallucinatory behaviour ≥ 4    | 25.1 (6.2); 189  | 25.6 (6.0); 203  |
| Grandiosity < 5                | 23.6 (5.5); 207  | 24.1 (5.1); 208  |
| Grandiosity ≥ 5                | 31.1 (4.0); 35   | 31.4 (4.9); 37   |
| Suspiciousness persecution < 5 | 21.5 (5.2); 119  | 21.8 (4.8); 113  |
| Suspiciousness persecution ≥ 5 | 27.8 (4.7); 123  | 28.1 (4.8); 132  |
| PANSS negative                 |                  |                  |
| Delusions < 4                  | 19.6 (5.4); 34   | 20.4 (7.7); 38   |
| Delusions ≥ 4                  | 19.3 (6.2); 208  | 19.2 (6.1); 207  |
| Hallucinatory behaviour < 4    | 19.3 (6.4); 53   | 19.2 (5.8); 42   |
| Hallucinatory behaviour ≥ 4    | 19.3 (6.0); 189  | 19.5 (6.5); 203  |
| Grandiosity < 5                | 19.8 (6.1); 207  | 19.6 (6.4); 208  |
| Grandiosity ≥ 5                | 16.7 (4.9); 35   | 18.4 (5.9); 37   |
| Suspiciousness persecution < 5 | 18.2 (5.4); 119  | 18.5 (6.9); 113  |

|                                     |                 |                 |
|-------------------------------------|-----------------|-----------------|
| Suspiciousness persecution $\geq 5$ | 20.4 (6.5); 123 | 20.2 (5.8); 132 |
| PANSS disorganised                  |                 |                 |
| Delusions $< 4$                     | 21.9 (6.5); 34  | 23.3 (7.4); 38  |
| Delusions $\geq 4$                  | 25.2 (6.4); 208 | 25.1 (6.4); 207 |
| Hallucinatory behaviour $< 4$       | 25.3 (6.2); 53  | 24.8 (6.2); 42  |
| Hallucinatory behaviour $\geq 4$    | 24.6 (6.6); 189 | 24.8 (6.6); 203 |
| Grandiosity $< 5$                   | 24.0 (6.1); 207 | 24.3 (6.4); 208 |
| Grandiosity $\geq 5$                | 29.1 (7.5); 35  | 27.7 (6.7); 37  |
| Suspiciousness persecution $< 5$    | 24.2 (6.5); 119 | 23.9 (7.2); 113 |
| Suspiciousness persecution $\geq 5$ | 25.3 (6.5); 123 | 25.6 (5.8); 132 |
| PANSS excitement                    |                 |                 |
| Delusions $< 4$                     | 15.2 (3.7); 34  | 15.9 (3.9); 38  |
| Delusions $\geq 4$                  | 18.5 (4.4); 208 | 18.3 (4.3); 207 |
| Hallucinatory behaviour $< 4$       | 18.4 (4.4); 53  | 18.2 (3.7); 42  |
| Hallucinatory behaviour $\geq 4$    | 17.9 (4.5); 189 | 17.8 (4.5); 203 |
| Grandiosity $< 5$                   | 17.4 (4.2); 207 | 17.4 (4.3); 208 |
| Grandiosity $\geq 5$                | 21.4 (4.5); 35  | 20.8 (3.3); 37  |
| Suspiciousness persecution $< 5$    | 16.6 (3.9); 119 | 16.6 (4.0); 113 |
| Suspiciousness persecution $\geq 5$ | 19.4 (4.6); 123 | 19.0 (4.3); 132 |
| PANSS emotional distress            |                 |                 |
| Delusions $< 4$                     | 23.6 (5.2); 34  | 24.8 (5.2); 38  |
| Delusions $\geq 4$                  | 27.6 (5.5); 208 | 27.9 (5.5); 207 |
| Hallucinatory behaviour $< 4$       | 25.9 (5.1); 53  | 27.2 (4.6); 42  |
| Hallucinatory behaviour $\geq 4$    | 27.3 (5.8); 189 | 27.5 (5.7); 203 |
| Grandiosity $< 5$                   | 27.0 (5.7); 207 | 27.5 (5.5); 208 |
| Grandiosity $\geq 5$                | 27.0 (5.0); 35  | 27.2 (6.0); 37  |
| Suspiciousness persecution $< 5$    | 23.8 (4.6); 119 | 24.8 (4.9); 113 |
| Suspiciousness persecution $\geq 5$ | 30.2 (4.7); 123 | 29.7 (5.1); 132 |

**PANSS outcomes using multiple imputation**

|                          | <b>MD</b> | <b>95% CI</b>  | <b>p-value</b> |
|--------------------------|-----------|----------------|----------------|
| PANSS total              |           |                |                |
| 9 months                 | -2.50     | (-4.98, -0.02) | 0.048          |
| 21 months                | -0.63     | (-3.22, 1.96)  | 0.63           |
| PANSS positive           |           |                |                |
| 9 months                 | -1.64     | (-2.65, -0.63) | 0.002          |
| 21 months                | -0.74     | (-1.80, 0.33)  | 0.17           |
| PANSS negative           |           |                |                |
| 9 months                 | -0.43     | (-1.44, 0.59)  | 0.41           |
| 21 months                | 0.28      | (-0.77, 1.32)  | 0.60           |
| PANSS disorganised       |           |                |                |
| 9 months                 | 0.05      | (-0.88, 0.98)  | 0.92           |
| 21 months                | 0.22      | (-0.75, 1.19)  | 0.66           |
| PANSS excitement         |           |                |                |
| 9 months                 | -1.14     | (-1.84, -0.44) | 0.001          |
| 21 months                | -0.51     | (-1.25, 0.23)  | 0.18           |
| PANSS emotional distress |           |                |                |
| 9 months                 | -1.04     | (-2.02, -0.05) | 0.040          |
| 21 months                | -0.10     | (-1.14, 0.94)  | 0.85           |

**PANSS outcomes after removing participants who discontinued clozapine due to side effects**

|                                 | <b>CBT<br/>(N=242)</b> | <b>TAU<br/>(N=245)</b> | <b>Mean<br/>difference</b> | <b>95% CI</b>    | <b>P Value</b> |
|---------------------------------|------------------------|------------------------|----------------------------|------------------|----------------|
| <b>PANSS total</b>              |                        |                        |                            |                  |                |
| Baseline                        | 82.8 (14.0); 226       | 82.8 (13.7); 222       |                            |                  |                |
| 9 months                        | 75.6 (15.5); 204       | 77.1 (14.0); 203       | -1.84                      | (-4.27 to 0.58)  | 0.14           |
| 21 months                       | 73.1 (16.8); 195       | 73.8 (14.8); 196       | -1.05                      | (-3.53 to 1.43)  | 0.41           |
| <b>PANSS positive</b>           |                        |                        |                            |                  |                |
| Baseline                        | 24.7 (6.0); 226        | 24.9 (5.7); 222        |                            |                  |                |
| 9 months                        | 21.8 (6.6); 204        | 23.2 (6.1); 204        | -1.25                      | (-2.25 to -0.25) | 0.014          |
| 21 months                       | 21.2 (6.9); 195        | 22.3 (6.1); 196        | -0.94                      | (-1.96 to 0.08)  | 0.071          |
| <b>PANSS negative</b>           |                        |                        |                            |                  |                |
| Baseline                        | 19.3 (6.2); 226        | 19.4 (6.3); 222        |                            |                  |                |
| 9 months                        | 18.2 (7.0); 206        | 18.8 (6.7); 205        | -0.63                      | (-1.63 to 0.38)  | 0.22           |
| 21 months                       | 17.7 (6.7); 197        | 17.6 (6.1); 196        | 0.03                       | (-1.00 to 1.06)  | 0.95           |
| <b>PANSS disorganised</b>       |                        |                        |                            |                  |                |
| Baseline                        | 24.8 (6.6); 226        | 24.7 (6.5); 222        |                            |                  |                |
| 9 months                        | 23.4 (6.5); 204        | 23.0 (5.9); 204        | 0.16                       | (-0.77 to 1.09)  | 0.74           |
| 21 months                       | 22.9 (6.7); 196        | 22.4 (6.3); 196        | 0.21                       | (-0.74 to 1.16)  | 0.67           |
| <b>PANSS excitement</b>         |                        |                        |                            |                  |                |
| Baseline                        | 17.9 (4.4); 226        | 17.8 (4.3); 222        |                            |                  |                |
| 9 months                        | 16.2 (4.1); 206        | 17.2 (4.1); 206        | -1.07                      | (-1.77 to -0.37) | 0.003          |
| 21 months                       | 15.4 (4.0); 196        | 15.9 (3.9); 196        | -0.65                      | (-1.37 to 0.06)  | 0.074          |
| <b>PANSS emotional distress</b> |                        |                        |                            |                  |                |

|           |                 |                 |       |                    |       |
|-----------|-----------------|-----------------|-------|--------------------|-------|
| Baseline  | 27.1 (5.7); 226 | 27.3 (5.5); 222 |       |                    |       |
| 9 months  | 24.2 (6.2); 206 | 25.1 (6.2); 206 | -0.82 | (-1.78 to<br>0.14) | 0.095 |
| 21 months | 23.3 (6.5); 196 | 23.9 (6.0); 196 | -0.40 | (-1.38 to<br>0.59) | 0.43  |



**CACE analysis estimates for PANSS outcomes using a minimum of 6 sessions of CBT attendance**

|                          | <b>Mean difference</b> | <b>95% CI</b>    | <b>p-value</b> |
|--------------------------|------------------------|------------------|----------------|
| <b>9 months PANSS</b>    |                        |                  |                |
| PANSS total              | -2.50                  | (-5.10 to 0.11)  | 0.060          |
| PANSS positive           | -0.52                  | (-1.60 to 0.56)  | 0.35           |
| PANSS negative           | -1.67                  | (-2.68 to -0.67) | 0.001          |
| PANSS disorganised       | -0.00                  | (-0.97 to 0.97)  | 0.99           |
| PANSS excitement         | -1.28                  | (-2.05 to -0.50) | 0.001          |
| PANSS emotional distress | -1.17                  | (-2.21 to -0.13) | 0.028          |
| <b>21 months PANSS</b>   |                        |                  |                |
| PANSS total              | -0.87                  | (-3.69 to 1.96)  | 0.55           |
| PANSS positive           | 0.36                   | (-0.76 to 1.48)  | 0.53           |
| PANSS negative           | -0.95                  | (-2.10 to 0.19)  | 0.10           |
| PANSS disorganised       | 0.17                   | (-0.87 to 1.22)  | 0.74           |
| PANSS excitement         | -0.56                  | (-1.32 to 0.20)  | 0.15           |
| PANSS emotional distress | -0.33                  | (-1.47 to 0.80)  | 0.57           |

### Potential unwanted effects of trial participation

|                                                 |                        |                        |
|-------------------------------------------------|------------------------|------------------------|
| Forms returned                                  | 313 of 487 = 64.2%     |                        |
| Forms returned by group                         | CBT 146 of 242 (60.3%) | TAU 167 of 245 (68.1%) |
| Participants endorsing at least one item 3 or 4 | CBT n=40/146 (27.3%)   | TAU n=42/167 (25.1%)   |

Total counts for all participant responses (i.e. TAU and CBT plus TAU)

| Item* | 0<br>Not at all | 1<br>Very little | 2<br>A little | 3<br>Quite a lot | 4<br>Very much | Responses<br>n=313 | Missing |
|-------|-----------------|------------------|---------------|------------------|----------------|--------------------|---------|
| Q1    | 114             | 43               | 79            | 54               | 21             | 311                | 2       |
| Q2    | 243             | 45               | 17            | 3                | 3              | 311                | 2       |
| Q3    | 165             | 66               | 65            | 12               | 2              | 310                | 3       |
| Q4    | 221             | 49               | 34            | 8                | 1              | 313                | -       |
| Q5    | 225             | 45               | 33            | 6                | 2              | 311                | 2       |
| Q6    | 256             | 36               | 15            | 2                | 1              | 310                | 3       |
| Q7    | 190             | 58               | 45            | 11               | 7              | 311                | 2       |
| Q8    | 147             | 62               | 65            | 24               | 14             | 312                | 1       |
| Q9    | 262             | 31               | 14            | 5                | -              | 312                | 1       |
| Q10   | 211             | 59               | 34            | 8                | 1              | 313                | -       |
| Q11   | 219             | 61               | 22            | 10               | 1              | 313                | -       |
| Q12   | 280             | 19               | 11            | 3                | -              | 313                | -       |
| Q13   | 279             | 21               | 8             | 3                | 2              | 313                | -       |
| Q14   | 253             | 39               | 16            | 1                | 1              | 310                | 3       |
| Q15   | 289             | 15               | 5             | 2                | -              | 311                | 2       |
| Q16   | 259             | 33               | 13            | 5                | -              | 310                | 3       |
| Q17   | 283             | 17               | 6             | 2                | 1              | 309                | 4       |
| Q18   | 263             | 21               | 7             | 6                | 6              | 303                | 10      |
| Q19   | 155             | 59               | 64            | 21               | 4              | 303                | 10      |
| Q20   | 282             | 12               | 7             | 1                | -              | 302                | 11      |
| Q21   | 229             | 43               | 19            | 9                | 3              | 303                | 10      |
| Q22   | 273             | 17               | 8             | 5                | -              | 303                | 10      |
| Q23   | 228             | 39               | 25            | 8                | 1              | 301                | 12      |
| Q24   | 196             | 43               | 43            | 16               | 4              | 302                | 11      |
| Q25   | 286             | 7                | 2             | 2                | 1              | 298                | 15      |
| Q26   | 237             | 38               | 22            | 3                | 2              | 302                | 11      |
| Q27   | 171             | 42               | 61            | 15               | 7              | 296                | 17      |

\* For item description see subsequent tables

# CBT plus TAU Group Responses

| Taking part -                                                                    | 0   | 1  | 2  | 3  | 4 | Resp.<br>n=146 | M |
|----------------------------------------------------------------------------------|-----|----|----|----|---|----------------|---|
| 1 hasn't helped me with my problems                                              | 58  | 16 | 38 | 24 | 9 | 145            | 1 |
| 2 made my problems worse                                                         | 117 | 17 | 7  | 2  | 1 | 144            | 2 |
| 3 made me feel more anxious                                                      | 82  | 26 | 31 | 6  | - | 145            | 1 |
| 4 took up too much time                                                          | 105 | 24 | 13 | 4  | - | 146            | - |
| 5 led to my mood becoming very low                                               | 103 | 22 | 15 | 3  | 2 | 145            | 1 |
| 6 made me feel more angry and irritable                                          | 121 | 13 | 9  | 2  | - | 145            | 1 |
| 7 I didn't feel ready to talk about my problems                                  | 91  | 24 | 19 | 6  | 6 | 146            | - |
| 8 made me think too much about bad things that have happened in the past         | 71  | 25 | 29 | 11 | 9 | 145            | 1 |
| 9 meant I stopped looking after myself properly                                  | 121 | 15 | 7  | 2  | - | 145            | 1 |
| 10 made me feel more suspicious                                                  | 100 | 31 | 11 | 4  | - | 146            | - |
| 11 required too much energy or motivation                                        | 100 | 33 | 7  | 5  | 1 | 146            | - |
| 12 increased my thoughts of killing myself                                       | 132 | 8  | 6  | -  | - | 146            | - |
| 13 I didn't feel listened to or believed by FOCUS staff                          | 131 | 10 | 3  | 2  | - | 146            | - |
| 14 made my voices or visions worse                                               | 121 | 15 | 6  | 1  | 1 | 144            | 2 |
| 15 was making me fall out with my family or friends                              | 137 | 6  | 1  | 1  | - | 145            | 1 |
| 16 was having a bad effect on my self-esteem                                     | 120 | 16 | 4  | 4  | - | 144            | 2 |
| 17 was making me want to harm myself                                             | 136 | 8  | -  | 1  | - | 145            | 1 |
| 18 I didn't like or feel I could trust the FOCUS team members                    | 127 | 6  | 5  | 2  | 2 | 142            | 4 |
| 19 I felt embarrassed talking about my problems with people I had not met before | 77  | 24 | 31 | 8  | 2 | 142            | 4 |
| 20 made me have thoughts of harming other people                                 | 137 | 2  | 2  | -  | - | 141            | 5 |
| 21 was making me feel hopeless about the future                                  | 102 | 25 | 8  | 5  | 2 | 142            | 4 |
| 22 meant I had to increase my medication in order to cope                        | 131 | 5  | 3  | 3  | - | 142            | 4 |
| 23 involved too much hard work.                                                  | 108 | 17 | 14 | 2  | 1 | 142            | 4 |
| 24 made me worry that people would think badly of me because of my diagnosis     | 98  | 16 | 18 | 8  | 1 | 141            | 5 |
| 25 made me fall out with my doctor or care team                                  | 133 | 5  | 1  | 1  | 1 | 141            | 5 |
| 26 made me worry about losing control of my mind                                 | 107 | 21 | 10 | 2  | 2 | 142            | 4 |
| 27 My problems have improved to the point I no longer feel I need help           | 73  | 17 | 35 | 12 | 3 | 140            | 6 |

## TAU Group Responses

| Taking part -                                                                    | 0   | 1  | 2  | 3  | 4  | Resp.<br>n=167 | M  |
|----------------------------------------------------------------------------------|-----|----|----|----|----|----------------|----|
| 1 hasn't helped me with my problems                                              | 56  | 27 | 41 | 30 | 12 | 166            | 1  |
| 2 made my problems worse                                                         | 126 | 28 | 10 | 1  | 2  | 167            | -  |
| 3 made me feel more anxious                                                      | 83  | 40 | 34 | 6  | 2  | 165            | 2  |
| 4 took up too much time                                                          | 116 | 25 | 21 | 4  | 1  | 167            | -  |
| 5 led to my mood becoming very low                                               | 122 | 23 | 18 | 3  | -  | 166            | 1  |
| 6 made me feel more angry and irritable                                          | 135 | 23 | 6  | -  | 1  | 165            | 2  |
| 7 I didn't feel ready to talk about my problems                                  | 99  | 34 | 26 | 5  | 1  | 165            | 2  |
| 8 made me think too much about bad things that have happened in the past         | 76  | 37 | 36 | 13 | 5  | 167            | -  |
| 9 meant I stopped looking after myself properly                                  | 141 | 16 | 7  | 3  | -  | 167            | -  |
| 10 made me feel more suspicious                                                  | 111 | 28 | 23 | 4  | 1  | 167            | -  |
| 11 required too much energy or motivation                                        | 119 | 28 | 15 | 5  | -  | 167            | -  |
| 12 increased my thoughts of killing myself                                       | 148 | 11 | 5  | 3  | -  | 167            | -  |
| 13 I didn't feel listened to or believed by FOCUS staff                          | 148 | 11 | 5  | 1  | 2  | 167            | -  |
| 14 made my voices or visions worse                                               | 132 | 24 | 10 | -  | -  | 166            | 1  |
| 15 was making me fall out with my family or friends                              | 152 | 9  | 4  | 1  | -  | 166            | 1  |
| 16 was having a bad effect on my self-esteem                                     | 139 | 17 | 9  | 1  | -  | 166            | 1  |
| 17 was making me want to harm myself                                             | 147 | 9  | 6  | 1  | 1  | 164            | 3  |
| 18 I didn't like or feel I could trust the FOCUS team members                    | 136 | 15 | 2  | 4  | 4  | 161            | 6  |
| 19 I felt embarrassed talking about my problems with people I had not met before | 78  | 35 | 33 | 13 | 2  | 161            | 6  |
| 20 made me have thoughts of harming other people                                 | 145 | 10 | 5  | 1  | -  | 161            | 6  |
| 21 was making me feel hopeless about the future                                  | 127 | 18 | 11 | 4  | 1  | 161            | 6  |
| 22 meant I had to increase my medication in order to cope                        | 142 | 12 | 5  | 2  | -  | 161            | 6  |
| 23 involved too much hard work.                                                  | 120 | 22 | 11 | 6  | -  | 159            | 8  |
| 24 made me worry that people would think badly of me because of my diagnosis     | 98  | 27 | 25 | 8  | 3  | 161            | 6  |
| 25 made me fall out with my doctor or care team                                  | 153 | 2  | 1  | 1  | -  | 157            | 10 |
| 26 made me worry about losing control of my mind                                 | 130 | 17 | 12 | 1  | -  | 160            | 7  |
| 27 My problems have improved to the point I no longer feel I need help           | 98  | 25 | 26 | 3  | 4  | 156            | 11 |

## **The FOCUS Trial Group.**

Suzan Aydinlar, DPsy, Institute of Health and Wellbeing, University of Glasgow,  
Gartnavel Royal Hospital, 1055 Great Western Road, Glasgow, G12 0XH

James Courtley, Post Grad CBTp, Early Intervention in Psychosis Service,  
Northumberland, Tyne and Wear NHS Foundation Trust, Sunderland, SR5 1NB, UK

Maggie Douglas-Bailey MSc, Northumberland, Tyne and Wear NHS Foundation  
Trust, Centre for Aging and Vitality, Newcastle General Hospital, Westgate Road,  
NE4 6BE, UK

Elizabeth Graves, MSc, Research and Development, Southern Health NHS  
Foundation Trust, Southampton, SO30 3JB, UK

Natasha Holden D.Clin.Psy., Psychosis Research Unit, Greater Manchester Mental  
Health NHS Trust, Prestiwich, M25 3BL, UK

Jane Hutton D.Clin.Psy, NHS Lothian, Royal Edinburgh Hospital, Edinburgh, UK

Paul Hutton, D.Clin.Psy., School of Health and Social Care, Napier University,  
Edinburgh, EH11 4BN, UK

Susan Irving, BA, Institute of Health and Wellbeing, University of Glasgow, Gartnavel  
Royal Hospital, 1055 Great Western Road, Glasgow, G12 0XH, UK

Clare Jackson D.Clin.Psy, NHS Lothian, Royal Edinburgh Hospital, Edinburgh, UK

Toyah Lebert BSc (Hons), Hadrian Clinic, Ground Floor, Campus for Aging and  
Vitality, Newcastle upon Tyne, NE4 6BE

Helen Mander; D.Clin.Psy, Poole Community Mental Health Team, Poole, Dorset  
HealthCare University NHS Foundation Trust, Poole, BH12 4NB , UK

Laura McCartney PG Diploma in Cognitive Behavioural Therapy, Early Intervention in Psychosis Service Gateshead, Northumberland, Tyne and Wear NHS Foundation Trust, UK

Trevor Munro-Clark, BSc (Hons), Acute Mental Health Care, Southern Health NHS Foundation Trust, Southampton, PO9 2BF, UK

Elizabeth Kim Murphy D.Clin.Psy., Psychosis Research Unit, Greater Manchester Mental Health NHS Trust, Prestwich, M25 3BL, UK

Mairi Spanswick, D.Clin.Psy, NHS Greater Glasgow and Clyde, UK

Ann Steele D.Clin.Psy., Psychosis Research Unit, Greater Manchester Mental Health NHS Trust, Prestwich, M25 3BL, UK

Liesbeth Tip, M.A., Department of Clinical Psychology, University of Edinburgh. Medical School, Teviot Place, Edinburgh, EH8 9AG, UK

Sarah Tully PhD, Psychosis Research Unit, Greater Manchester Mental Health NHS Trust, Prestwich, M25 3BL, UK
